# Supplementary material
Source: publisher figshare collection journal article supplement (https://acs.figshare.com/ndownloader/files/4107334)
Supplement: Supplementary file 1 [file 4107334]

data_6

#==============================================================================
 
# 5. CHEMICAL DATA
_chemical_name_systematic
;
;
_chemical_name_common                ?
_chemical_melting_point              ?
_chemical_formula_moiety             ? 
_chemical_formula_structural         ?
_chemical_formula_sum
'C12 H12 Cu N12 '
_chemical_formula_iupac              ?
_chemical_formula_weight             387.89
_chemical_compound_source           'see text'
 
loop_
 _atom_type_symbol
 _atom_type_description
 _atom_type_scat_dispersion_real
 _atom_type_scat_dispersion_imag
 _atom_type_scat_source
 'C'  'C'   0.018   0.009
 'Brennan & Cowan'
 'H'  'H'   0.0000   0.0000
 'Brennan & Cowan'
 'N'  'N'   0.031   0.018
 'Brennan & Cowan'
 'Cu'  'Cu'   -1.965   0.589
 'Brennan & Cowan'


#==============================================================================


_symmetry_cell_setting                  Monoclinic
_symmetry_space_group_name_Hall      '-C 2yc ' 
_symmetry_space_group_name_H-M C2/c
_symmetry_Int_Tables_number                  15

loop_
_symmetry_equiv_pos_site_id
_symmetry_equiv_pos_as_xyz
		1 'x, y, z'          
		2 '-x, y, -z+1/2'
		3 '-x, -y, -z'
		4 'x, -y, z+1/2'
		5 'x+1/2, y+1/2, z'               
		6 '-x+1/2, y+1/2, -z+1/2'
		7 '-x+1/2, -y+1/2, -z'
		8 'x+1/2, -y+1/2, z+1/2'

	
	
_cell_length_a  24.4913(10)
_cell_length_b  4.34232(12)
_cell_length_c  14.20752(55)
_cell_angle_alpha 90
_cell_angle_beta  78.8847(26)
_cell_angle_gamma 90
_cell_volume 1482.612(94)

_cell_formula_units_Z                    4
_cell_measurement_temperature            298
                                                                                       
_cell_special_details
;
;


 
_exptl_crystal_density_meas          ?
_exptl_crystal_density_diffrn            1.737
_exptl_crystal_density_method       'Not Measured'
_exptl_crystal_F_000                       788.0
# The next three fields give the specimen dimensions in mm.  The equatorial 
# plane contains the incident and diffracted beam.
_pd_spec_size_axial              10 
# perpendicular to equatorial plane
_pd_spec_size_equat              0.7 
# parallel to scattering vector  in transmission
_pd_spec_size_thick              ? 
# parallel to scattering vector  in reflection

# The next five fields are character fields that describe the specimen.
_pd_spec_mounting                '0.7 mm borosilicate capillary'
_pd_spec_mount_mode              transmission
_pd_spec_shape                   cylinder
_pd_char_particle_morphology     'visual estimate, prisms'
_pd_char_colour                  green

# The following three fields describe the preparation of the specimen.   
# The cooling rate is in K/min.  The pressure at which the sample was  
# prepared is in kPa.  The temperature of preparation is in K.
_pd_prep_cool_rate               ?
_pd_prep_pressure                ?
_pd_prep_temperature             298

# The next four fields are normally only needed for transmission experiments.
_exptl_absorpt_coefficient_mu    2.329
_exptl_absorpt_correction_type   none
_exptl_absorpt_process_details   ? # include if applicable
_exptl_absorpt_correction_T_min  ? # include if applicable
_exptl_absorpt_correction_T_max  ? # include if applicable


#==============================================================================
 
# 7. EXPERIMENTAL DATA
 
_exptl_special_details
;
;

# This following item is used to identify the equipment used to record the
# powder pattern when the diffractogram was measured at a laboratory
# other than the authors' home institution, e.g. when neutron or synchrotron
# radiation is used.

_diffrn_ambient_temperature          298
_diffrn_radiation_probe              X-ray
_diffrn_radiation_type               'Cu K\a'


# The following six items are used for angular dispersive measurements only.
_diffrn_radiation_wavelength      1.54177
_diffrn_source                   ?
_diffrn_source_type               ?
_diffrn_source_target             ?
_diffrn_measurement_device_type	  ?

_diffrn_radiation_monochromator  ?
_diffrn_detector                 ?
_diffrn_detector_type            ?
_pd_meas_scan_method             step
_pd_meas_special_details         
;


;

# The following four items give details of the measured (not processed)
# powder pattern.  Angles are in degrees.
_pd_meas_number_of_points        4786
_pd_meas_2theta_range_min        3.0
_pd_meas_2theta_range_max        70.0
_pd_meas_2theta_range_inc        0.014

_diffrn_reflns_limit_h_min       0
_diffrn_reflns_limit_h_max      18    
_diffrn_reflns_limit_k_min       -3
_diffrn_reflns_limit_k_max      3
_diffrn_reflns_limit_l_min        -10
_diffrn_reflns_limit_l_max       10
_diffrn_reflns_number              331
 

# The following fields are used to identify the programs used.
_computing_data_collection       ?
_computing_data_reduction        'DASH (David et al., 2001)'
_computing_structure_solution    'DASH (David et al., 2001)'
_computing_structure_refinement  'Topas (Coelho, 2003)'
_computing_publication_material 
'enCifer (Cambridge Crystallographic Data Centre, 2004)'

 
#==============================================================================
 
# 8. REFINEMENT DATA

# Use the next field to give any special details about the fitting of the
# powder pattern.
_pd_proc_ls_special_details      
; 

The structure solution was obtained by global optimisation using the
DASH structure solution program.  The internal coordinate 
description of the molecule was constructed from standard bond
lengths, bond angles and bond torsions where appropriate.
The structure was solved using data to 30.00\% 2\q. 
The structure was refined against data in the range 
3.0 to 70.0\% 2\q (331 reflections).  
;

# The next three items are given as text.
_pd_proc_ls_profile_function     
;   
Fundamental parameters with axial divergence correction
;
_pd_proc_ls_background_function  
;
Chebyshev polynomial
;
_pd_proc_ls_pref_orient_corr     
; 
A spherical harmonics-based preferred orientation correction 
was applied with Topas during the Rietveld refinement.
;

_pd_proc_ls_prof_R_factor        0.0386
_pd_proc_ls_prof_wR_factor       0.0504
_pd_proc_ls_prof_wR_expected     0.0377

_refine_special_details          
; ?
;

_refine_ls_matrix_type           sparse
_refine_ls_weighting_scheme      sigma
_refine_ls_weighting_details     1/\s(Y~obs~)^2^
_refine_ls_hydrogen_treatment    constr
_refine_ls_extinction_method     none
_refine_ls_extinction_coef       ?
_refine_ls_number_parameters     94
_refine_ls_number_restraints     36
_refine_ls_number_constraints    20
_refine_diff_density_max         ?
_refine_diff_density_min         ?
_refine_ls_shift/su_max          0.005
_refine_ls_R_I_factor	?

# The following item is the same as CHI, the square root of 'CHI squared'
_refine_ls_goodness_of_fit_all   1.320

# Give appropriate details in the next two text fields.
_pd_proc_info_excluded_regions   ?
_pd_proc_info_data_reduction     ?
 
#==============================================================================


# 9. ATOMIC COORDINATES AND DISPLACEMENT PARAMETERS

loop_
_atom_site_label
_atom_site_type_symbol
_atom_site_thermal_displace_type
_atom_site_fract_x
_atom_site_fract_y                                                                                                                                   
_atom_site_fract_z
_atom_site_occupancy
_atom_site_U_iso_or_equiv
_atom_site_calc_flag
_atom_site_refinement_flags

Cu1  Cu Uiso  0               0.3743(13)     0.25         1   0.0428(28)  .  .
N11  N  Uiso  0.07710(19)     0.3643(19)     0.29070(43)  1   0.0547(34)  .  .
C12  C  Uiso  0.08795(26)     0.5419(13)     0.36227(37)  1   0.0547(34)  .  .
H12  H  Uiso  0.05801         0.68073        0.41107      1   0.0657(41)  .  .
N13  N  Uiso  0.14107(14)     0.5173(11)     0.36248(33)  1   0.0547(34)  .  .
N14  N  Uiso  0.16628(18)     0.3265(18)     0.29219(45)  1   0.0547(34)  .  .
C15  C  Uiso  0.12586(28)     0.2412(14)     0.25135(37)  1   0.0547(34)  .  .
H15  H  Uiso  0.13128         0.08372        0.19060      1   0.0657(41)  .  .
C16  C  Uiso  0.17441(17)     0.68577(86)    0.42981(33)  1   0.0547(34)  .  .
H16A H  Uiso  0.19885         0.87018        0.39024      1   0.0657(41)  .  .
H16B H  Uiso  0.14549         0.78267        0.49046      1   0.0657(41)  .  .
C21  C  Uiso  0.21326(13)     0.46154(72)    0.46659(21)  1   0.0547(34)  .  .
C22  C  Uiso  0.26166(17)     0.35676(85)    0.40470(27)  1   0.0547(34)  .  .                                                             
H22  H  Uiso  0.27092         0.43828        0.33085      1   0.0657(41)  .  .
C23  C  Uiso  0.20222(17)     0.35081(86)    0.56230(32)  1   0.0547(34)  .  .
H23  H  Uiso  0.16493         0.42895        0.61111      1   0.0657(41)  .  .
N1   N  Uiso  -0.05761(29)   -0.1803(18)     0.47014(63)  1   0.0547(34)  .  .
N2   N  Uiso  -0.04402(16)   -0.09846(92)    0.39637(39)  1   0.0547(34)  .  .
N3   N  Uiso  -0.03032(30)   -0.0148(19)     0.32153(70)  1   0.0547(34)  .  .
                                                                              

#==============================================================================
 
# 10. MOLECULAR GEOMETRY
 
_geom_special_details
;
 Bond distances, angles etc. have been calculated using the
 rounded fractional coordinates. All su's are estimated
 from the variances of the (full) variance-covariance matrix.
 The cell esds are taken into account in the estimation of
 distances, angles and torsion angles
;
 
loop_
_geom_bond_atom_site_label_1
_geom_bond_atom_site_label_2
_geom_bond_distance
_geom_bond_site_symmetry_1
_geom_bond_site_symmetry_2
_geom_bond_publ_flag

Cu1   N3     2.036(10)    .     .        no
Cu1   N11    2.079(5)     .     .        no
Cu1   N3     2.886(10)    .     1_565    no
Cu1   N3     2.036(10)    .     2_555    no
Cu1   N11    2.079(5)     .     2_555    no
Cu1   N3     2.886(10)    .     2_565    no
N1    N2     1.095(10)    .     .        no
N2    N3     1.113(11)    .     .        no
N11   C12    1.344(9)     .     .        no
N11   C15    1.330(9)     .     .        no
N13   N14    1.352(8)     .     .        no
N13   C12    1.305(8)     .     .        no
N13   C16    1.555(6)     .     .        no
N14   C15    1.293(9)     .     .        no
C16   C21    1.523(5)     .     .        no
C21   C22    1.408(5)     .     .        no
C21   C23    1.418(5)     .     .        no
C22   C23    1.405(6)     .     7_556    no
C12   H12    1.0889       .     .        no
C15   H15    1.0890       .     .        no
C16   H16A   1.0890       .     .        no
C16   H16B   1.0890       .     .        no
C22   H22    1.0890       .     .        no
C23   H23    1.0890       .     .        no


  

                
loop_
_geom_angle_atom_site_label_1
_geom_angle_atom_site_label_2
_geom_angle_atom_site_label_3
_geom_angle
_geom_angle_site_symmetry_1
_geom_angle_site_symmetry_2
_geom_angle_site_symmetry_3
_geom_angle_publ_flag

 N3     Cu1   N11         96.2(3)        .       .       .          no
 N1     N2    N3         179.8(10)        .       .       .          no
 Cu1    N3    N2         139.6(7)        .       .       .          no
 Cu1    N11   C12        121.5(5)        .       .       .          no 
 Cu1    N11   C15        133.0(5)        .       .       .          no
 C12    N11   C15        104.8(5)        .       .       .          no
 N14    N13   C12        111.2(4)        .       .       .          no
 N14    N13   C16        121.6(4)        .       .       .          no
 C12    N13   C16        127.2(4)        .       .       .          no
 N13    N14   C15        103.1(5)        .       .       .          no 
 N11    C12   N13        107.3(5)        .       .       .          no
 N11    C15   N14        113.6(6)        .       .       .          no 
 N13    C16   C21        110.3(3)        .       .       .          no 
 C16    C21   C22        119.9(3)        .       .       .          no
 C16    C21   C23        122.0(3)        .       .       .          no
 C22    C21   C23        118.1(3)        .       .       .          no
 N11    C12   H12        126.35        .       .       .          no
 N13    C12   H12        126.35        .       .       .          no 
 N11    C15   H15        123.24        .       .       .          no
 N14    C15   H15        123.23        .       .       .          no 
 N13    C16   H16A       109.26        .       .       .          no 
 N13    C16   H16B       109.27        .       .       .          no
 C21    C16   H16A       109.25        .       .       .          no 
 C21    C16   H16B       109.25        .       .       .          no 
 H16A   C16   H16B       109.47        .       .       .          no
 C21    C22   H22        119.37        .       .       .          no 
 H22    C22   C23        120.16        .       .       7_556      no 
 C21    C23   H23        119.10        .       .       .          no
 H23    C23   C22        119.47        .       .       7_556      no 
                                                        

  

                                                          


loop_
_geom_torsion_atom_site_label_1
_geom_torsion_atom_site_label_2
_geom_torsion_atom_site_label_3
_geom_torsion_atom_site_label_4               
_geom_torsion
_geom_torsion_site_symmetry_1
_geom_torsion_site_symmetry_2
_geom_torsion_site_symmetry_3
_geom_torsion_site_symmetry_4
_geom_torsion_publ_flag

 N11  Cu1  N3   N2         69.0(10)      .       .       .       .       no 
 N11  Cu1  N3   Cu1       -78.6(4)      .       .       .       1_545   no 
 N3   Cu1  N3   N2        -32.4(11)      1_565   .       .       .       no 
 N3   Cu1  N3   N2        147.6(10)      2_555   .       .       .       no 
 N11  Cu1  N3   N2       -112.4(10)      2_555   .       .       .       no 
 N3   Cu1  N11  C12      -100.1(6)      .       .       .       .       no 
 N3   Cu1  N11  C15        91.1(8)      .       .       .       .       no 
 N3   Cu1  N11  C12        24.0(6)      1_565   .       .       .       no 
 N3   Cu1  N11  C15      -144.8(7)      1_565   .       .       .       no 
 N3   Cu1  N11  C12      -166.7(6)      2_555   .       .       .       no 
 N3   Cu1  N11  C15        24.6(8)      2_555   .       .       .       no 
 N3   Cu1  N11  C12        69.3(6)      2_565   .       .       .       no 
 N3   Cu1  N11  C15       -99.4(8)      2_565   .       .       .       no 
 Cu1  N11  C12  N13      -171.6(4)      .       .       .       .       no 
 C15  N11  C12  N13        -0.1(7)      .       .       .       .       no 
 Cu1  N11  C15  N14       170.1(6)      .       .       .       .       no 
 C12  N13  N14  C15        -0.1(7)      .       .       .       .       no 
 C16  N13  N14  C15      -178.2(5)      .       .       .       .       no 
 N14  N13  C12  N11         0.1(7)      .       .       .       .       no 
 C16  N13  C12  N11       178.1(5)      .       .       .       .       no 
 N14  N13  C16  C21       -46.8(6)      .       .       .       .       no 
 C12  N13  C16  C21       135.4(5)      .       .       .       .       no 
 N13  N14  C15  N11         0.1(8)      .       .       .       .       no 
 N13  C16  C21  C22        73.5(4)      .       .       .       .       no 
 N13  C16  C21  C23      -106.1(4)      .       .       .       .       no 
 C16  C21  C22  C23      -179.8(4)      .       .       .       7_556   no 
 C23  C21  C22  C23        -0.2(5)      .       .       .       7_556   no 
 C16  C21  C23  C22       179.8(4)      .       .       .       7_556   no 
 C22  C21  C23  C22         0.2(5)      .       .       .       7_556   no 
 C21  C22  C23  C21         0.2(6)      .       .       7_556   7_556   no 
 Cu1  N11  C12  H12         8.43      .       .       .       .       no 
 C15  N11  C12  H12       179.92      .       .       .       .       no 
 Cu1  N11  C15  H15        -9.92      .       .       .       .       no 
 C12  N11  C15  H15      -179.98      .       .       .       .       no 
 N14  N13  C12  H12      -179.90      .       .       .       .       no 
 C16  N13  C12  H12        -1.91      .       .       .       .       no        
 N14  N13  C16  H16A       73.33      .       .       .       .       no 
 N14  N13  C16  H16B     -166.93      .       .       .       .       no 
 C12  N13  C16  H16A     -104.47      .       .       .       .       no 
 C12  N13  C16  H16B       15.28      .       .       .       .       no 
 N13  N14  C15  H15      -179.97      .       .       .       .       no 
 H16A C16  C21  C22       -46.62      .       .       .       .       no 
 H16A C16  C21  C23       133.76      .       .       .       .       no 
 H16B C16  C21  C22      -166.36      .       .       .       .       no 
 H16B C16  C21  C23        14.03      .       .       .       .       no 
 C16  C21  C22  H22         0.22      .       .       .       .       no 
 C23  C21  C22  H22       179.85      .       .       .       .       no 
 C16  C21  C23  H23        -0.23      .       .       .       .       no 
 C22  C21  C23  H23      -179.85      .       .       .       .       no 
 C21  C22  C23  H23      -179.85      .       .       7_556   7_556   no 
 H22  C22  C23  C21      -179.84      .       .       7_556   7_556   no 
 H22  C22  C23  H23         0.10      .       .       7_556   7_556   no 
